# Supplementary material
Source: Springer Nature journal article supplement (https://www.springermedizin.de/resource/supplementary/12967_2008_338_MOESM1_ESM.pdf/9576252)

**A)**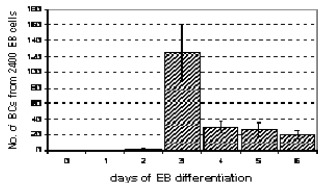**B)**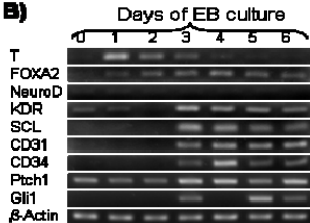**C)**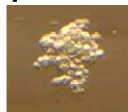**C)**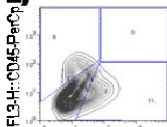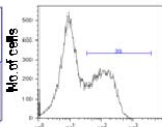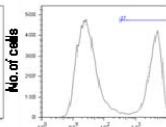

FL3-H::CD146-FITC

FL3-H::CD33-PerCp-Cy5.5

FL2-H::CD31-PE

**D)**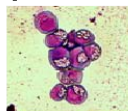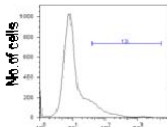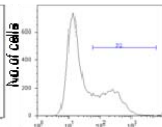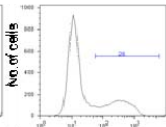

FL1-H::CD34-FITC

FL2-H::Flt-1-PE

FL2-H::CD144-PE

Supplement: MOESM1 [file 9576252]
